# Supplementary material
Source: PubMed Central journal article supplement (PMC6411432)
Supplement: NIHMS1517406-supplement-Supplemental_Data_File__doc__pdf__etc__.pdf [file NIHMS1517406-supplement-Supplemental_Data_File__doc__pdf__etc__.pdf]

# Direct Interactions With Cancer-Associated Fibroblasts Lead to Enhanced Pancreatic Cancer Stem Cell Function

## SUPPLEMENTAL DIGITAL CONTENT

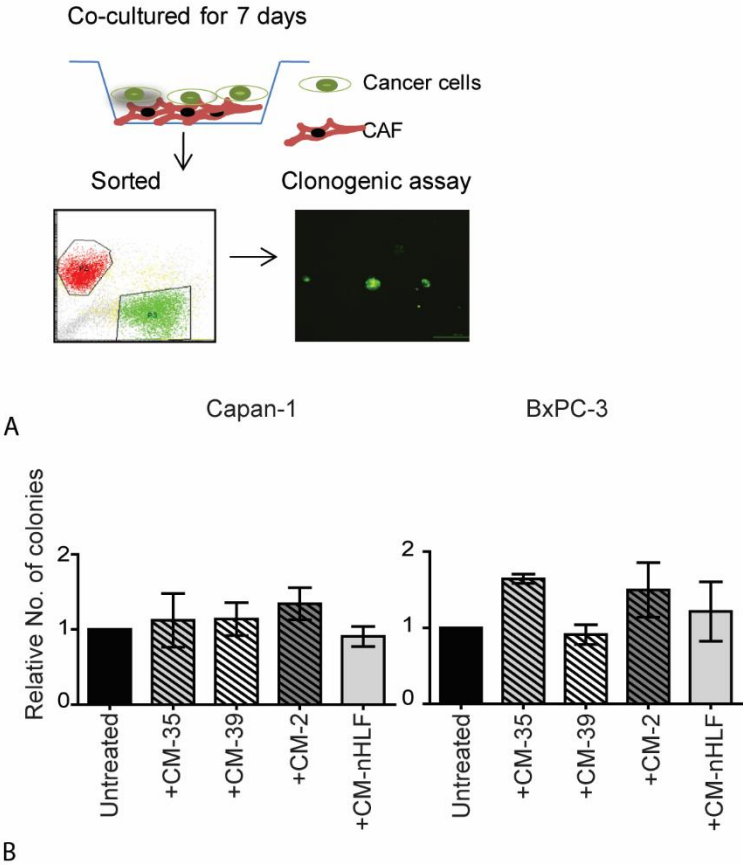

**SUPPLEMENTAL FIGURE 1.** Cancer associated fibroblasts enhance PDAC clonogenicity. A, Experimental schema. B, Colony formation by Capan-1 and BxPC-3 cells following co-culture with conditioned medium from CAF conditioned media or untreated control PANC-1 cells. Data represent the mean and SD of 3 experiments.

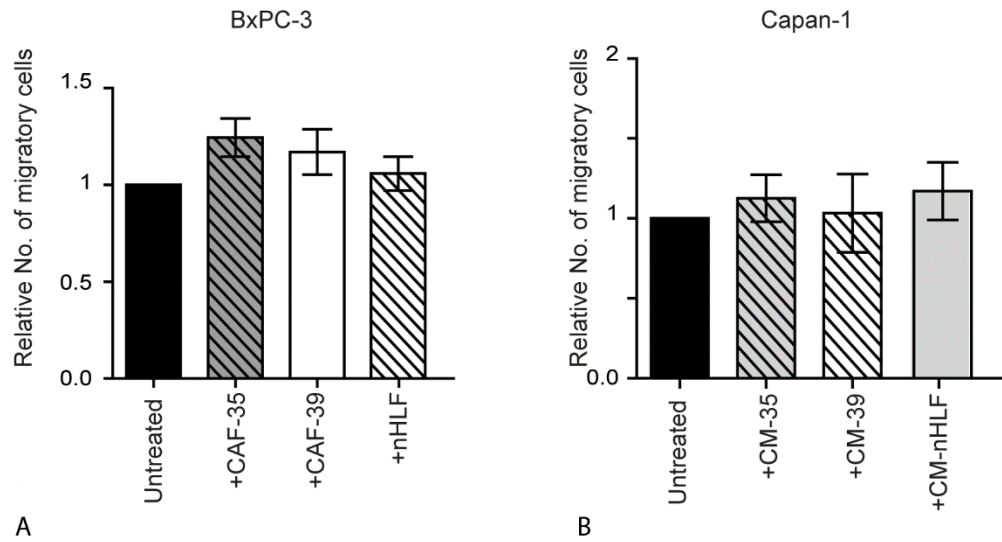

**SUPPLEMENTAL FIGURE 2.** Cancer-associated fibroblasts enhance PDAC cells migration. In vitro migration of A, BxPC-3 cells following co-culture with CAFs or B, Capan-1 cells following co-culture with a conditioned medium for 7 days. Data represent the mean and SD of 4 experiments. \* $P < 0.05$ .

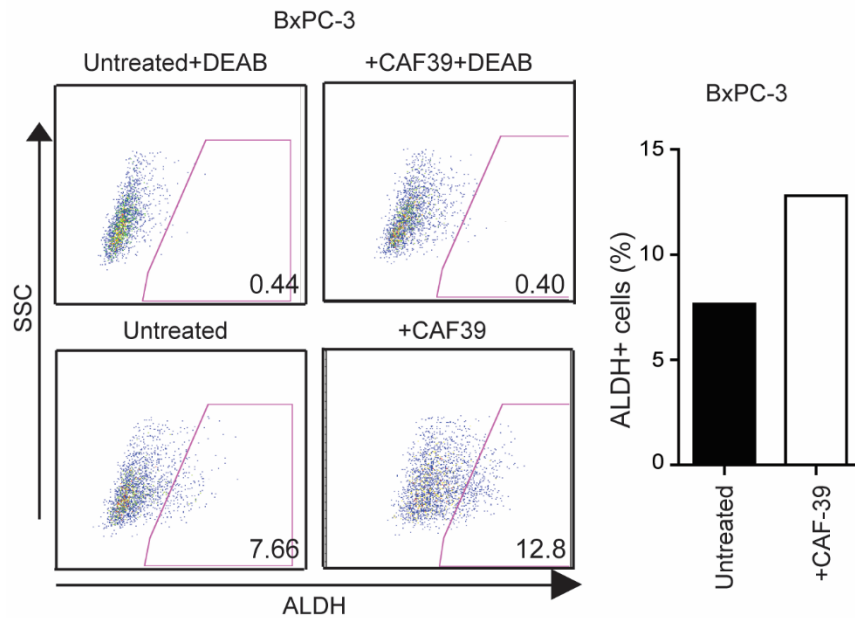

**SUPPLEMENTAL FIGURE 3.** Cancer-associated fibroblasts enhance the frequency of ALDH+ PDAC CSCs. The frequency of ALDH+ BxPC-3 cells following co-culture with CAFs. Cells treated with DEAB were used as negative control for ALDH staining.

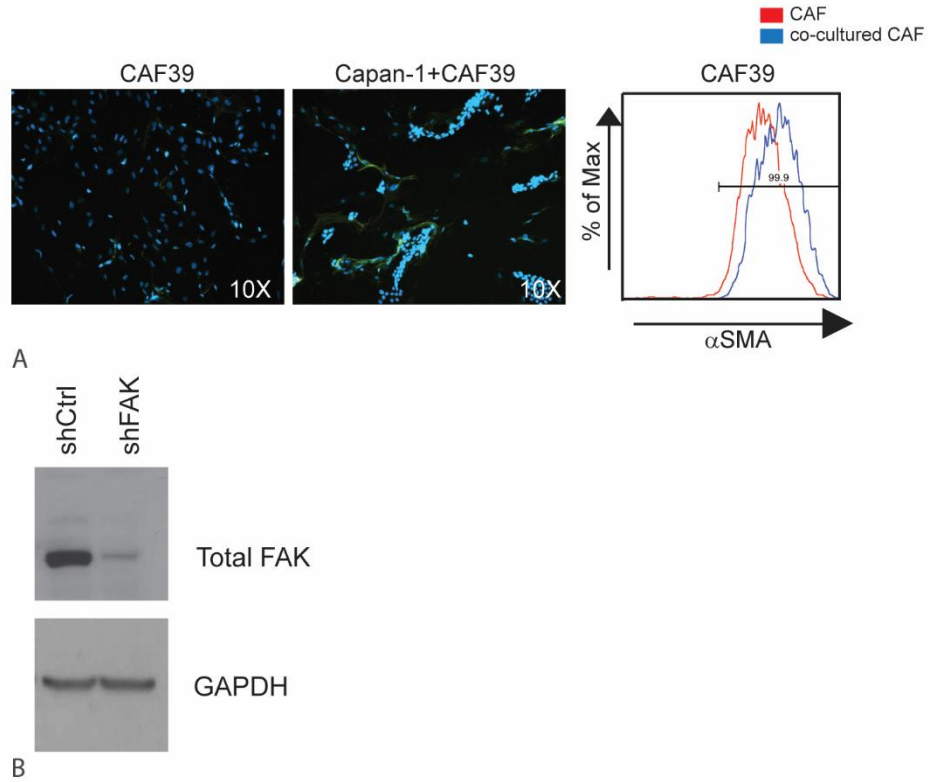

**SUPPLEMENTAL FIGURE 4.** Pancreatic cancer cells activate CAFs. A,  $\alpha$ SMA expression of CAF39 following culture with or without Capan-1 cells for 7 days. Left: immunostaining of  $\alpha$ SMA-green; nucleus-Hoechst 33342-blue. Right: Histogram of  $\alpha$ SMA expression by CAF39 cells before and after co-cultured with Capan-1. B, FAK expression following knockdown by shRNA in Capan-1 cells. Ctrl indicates control.
